# Supplementary material
Source: PubMed Central journal article supplement (PMC10015424)
Supplement: NIHMS1876585-supplement-supportingMaterial.pdf [file NIHMS1876585-supplement-supportingMaterial.pdf]

Citrus-Gene Interaction and Melanoma Risk in the UK Biobank

By Andrew R. Marley, Ming Li, Victoria L. Champion, Yiqing Song, Jiali Han, and Xin Li

### **Table of Contents for Supplementary Material**

**Table S1.** All SNPs found significant at  $5E-08$  according to the joint two-degree-of-freedom test

**Analysis of SNPs identified by Landi et al.**

**Table S2.** SNPs identified by Landi et al. and their results in the current analysis

**Table S1. All SNPs found significant at 5E-08 according to the joint two-degree-of-freedom test**

| SNP ID      | Chr | Position | Closest mapped gene | Ref allele | Minor allele | MAF   | Info score | p-2DF    | p-1DF |
|-------------|-----|----------|---------------------|------------|--------------|-------|------------|----------|-------|
| rs183783391 | 3   | 69950451 | <i>MITF</i>         | C          | T            | 0.013 | 0.95       | 4.25E-08 | 0.73  |
| rs10114692  | 9   | 21725261 | <i>RN7SL151P</i>    | C          | C            | 0.474 | 1.00       | 3.65E-09 | 0.44  |
| rs10116090  | 9   | 21723055 | <i>RN7SL151P</i>    | T          | T            | 0.475 | 1.00       | 2.20E-09 | 0.40  |
| rs10116451  | 9   | 21727352 | <i>RN7SL151P</i>    | G          | G            | 0.474 | 1.00       | 3.99E-09 | 0.42  |
| rs10116546  | 9   | 21727693 | <i>RN7SL151P</i>    | G          | G            | 0.475 | 1.00       | 3.33E-09 | 0.45  |
| rs10116567  | 9   | 21727702 | <i>RN7SL151P</i>    | G          | G            | 0.473 | 1.00       | 4.28E-09 | 0.48  |
| rs10118262  | 9   | 21759891 | <i>MTAP</i>         | C          | C            | 0.474 | 1.00       | 4.36E-09 | 0.44  |
| rs10119658  | 9   | 21757590 | <i>MTAP</i>         | T          | T            | 0.475 | 1.00       | 4.68E-09 | 0.47  |
| rs10283756  | 9   | 21731529 | <i>RN7SL151P</i>    | A          | A            | 0.474 | 1.00       | 4.63E-09 | 0.49  |
| rs10637623  | 9   | 21722394 | <i>RN7SL151P</i>    | G          | G            | 0.474 | 0.99       | 6.37E-09 | 0.48  |
| rs10738595  | 9   | 21745004 | <i>RN7SL151P</i>    | T          | T            | 0.475 | 1.00       | 5.61E-09 | 0.48  |
| rs10738597  | 9   | 21746396 | <i>RN7SL151P</i>    | T          | T            | 0.474 | 1.00       | 5.59E-09 | 0.48  |
| rs10738599  | 9   | 21774467 | <i>MTAP</i>         | T          | T            | 0.475 | 1.00       | 2.28E-09 | 0.38  |
| rs10757236  | 9   | 21715890 | <i>RN7SL151P</i>    | G          | G            | 0.486 | 0.99       | 2.30E-09 | 0.19  |
| rs10757237  | 9   | 21727369 | <i>RN7SL151P</i>    | G          | G            | 0.474 | 1.00       | 3.67E-09 | 0.44  |
| rs10757238  | 9   | 21732466 | <i>RN7SL151P</i>    | C          | C            | 0.474 | 1.00       | 3.85E-09 | 0.46  |
| rs10757239  | 9   | 21733113 | <i>RN7SL151P</i>    | G          | G            | 0.476 | 0.99       | 4.45E-09 | 0.48  |
| rs10757240  | 9   | 21734449 | <i>RN7SL151P</i>    | G          | G            | 0.474 | 1.00       | 4.02E-09 | 0.46  |
| rs10757241  | 9   | 21734480 | <i>RN7SL151P</i>    | G          | G            | 0.474 | 1.00       | 4.06E-09 | 0.46  |
| rs10757242  | 9   | 21739592 | <i>RN7SL151P</i>    | G          | G            | 0.475 | 1.00       | 5.94E-09 | 0.52  |
| rs10757243  | 9   | 21744802 | <i>RN7SL151P</i>    | C          | C            | 0.475 | 1.00       | 5.51E-09 | 0.48  |
| rs10757245  | 9   | 21746496 | <i>RN7SL151P</i>    | C          | C            | 0.474 | 1.00       | 5.59E-09 | 0.48  |
| rs10757246  | 9   | 21746587 | <i>RN7SL151P</i>    | A          | A            | 0.475 | 1.00       | 5.70E-09 | 0.48  |
| rs10757247  | 9   | 21747859 | <i>RN7SL151P</i>    | C          | C            | 0.474 | 1.00       | 5.60E-09 | 0.48  |
| rs10757250  | 9   | 21754226 | <i>MTAP</i>         | C          | C            | 0.475 | 1.00       | 4.66E-09 | 0.47  |

|             |   |          |                  |   |   |       |      |          |      |
|-------------|---|----------|------------------|---|---|-------|------|----------|------|
| rs10757251  | 9 | 21754372 | <i>MTAP</i>      | T | T | 0.474 | 1.00 | 4.60E-09 | 0.47 |
| rs10757252  | 9 | 21754588 | <i>MTAP</i>      | C | C | 0.475 | 1.00 | 4.65E-09 | 0.47 |
| rs10757253  | 9 | 21772267 | <i>MTAP</i>      | T | T | 0.475 | 1.00 | 2.68E-09 | 0.38 |
| rs10757254  | 9 | 21775061 | <i>MTAP</i>      | A | A | 0.474 | 1.00 | 2.17E-09 | 0.38 |
| rs10757255  | 9 | 21776631 | <i>MTAP</i>      | G | G | 0.475 | 0.99 | 1.98E-09 | 0.37 |
| rs10811583  | 9 | 21698355 | <i>RN7SL151P</i> | G | G | 0.488 | 0.94 | 1.42E-08 | 0.95 |
| rs10811584  | 9 | 21701005 | <i>RN7SL151P</i> | T | T | 0.461 | 0.99 | 4.23E-09 | 0.65 |
| rs10811592  | 9 | 21715201 | <i>RN7SL151P</i> | A | G | 0.488 | 0.99 | 1.51E-08 | 0.18 |
| rs10811595  | 9 | 21715801 | <i>RN7SL151P</i> | T | G | 0.486 | 0.99 | 2.32E-09 | 0.18 |
| rs10811596  | 9 | 21720826 | <i>RN7SL151P</i> | T | T | 0.477 | 0.99 | 3.50E-09 | 0.61 |
| rs10811600  | 9 | 21734802 | <i>RN7SL151P</i> | A | A | 0.474 | 1.00 | 4.08E-09 | 0.46 |
| rs10811601  | 9 | 21734833 | <i>RN7SL151P</i> | G | G | 0.474 | 1.00 | 4.08E-09 | 0.46 |
| rs10811602  | 9 | 21734836 | <i>RN7SL151P</i> | C | C | 0.474 | 1.00 | 4.08E-09 | 0.46 |
| rs10811604  | 9 | 21738437 | <i>RN7SL151P</i> | C | C | 0.474 | 1.00 | 5.73E-09 | 0.49 |
| rs10811605  | 9 | 21738444 | <i>RN7SL151P</i> | T | T | 0.474 | 1.00 | 5.95E-09 | 0.49 |
| rs10811613  | 9 | 21775342 | <i>MTAP</i>      | C | C | 0.474 | 1.00 | 2.76E-09 | 0.37 |
| rs10811617  | 9 | 21790067 | <i>MTAP</i>      | A | A | 0.469 | 0.99 | 1.23E-09 | 0.23 |
| rs10811618  | 9 | 21790142 | <i>MTAP</i>      | G | G | 0.469 | 0.99 | 1.22E-09 | 0.23 |
| rs10965122  | 9 | 21775508 | <i>MTAP</i>      | A | A | 0.474 | 1.00 | 2.03E-09 | 0.38 |
| rs10965127  | 9 | 21778976 | <i>MTAP</i>      | A | A | 0.474 | 1.00 | 1.24E-09 | 0.37 |
| rs113126107 | 9 | 21803729 | <i>MTAP</i>      | T | T | 0.477 | 0.99 | 3.38E-10 | 0.21 |
| rs113276233 | 9 | 21723265 | <i>RN7SL151P</i> | T | T | 0.473 | 0.99 | 5.05E-09 | 0.47 |
| rs11384803  | 9 | 21760452 | <i>MTAP</i>      | T | T | 0.476 | 0.99 | 3.83E-09 | 0.49 |
| rs11394388  | 9 | 21710108 | <i>RN7SL151P</i> | T | T | 0.453 | 1.00 | 2.30E-08 | 0.54 |
| rs12344842  | 9 | 21793177 | <i>MTAP</i>      | T | T | 0.470 | 0.99 | 1.40E-09 | 0.18 |
| rs12380505  | 9 | 21695893 | <i>KHSRPP1</i>   | A | A | 0.463 | 0.98 | 5.01E-09 | 0.81 |
| rs1335498   | 9 | 21711637 | <i>RN7SL151P</i> | A | A | 0.452 | 0.99 | 3.28E-08 | 0.53 |
| rs1335499   | 9 | 21711647 | <i>RN7SL151P</i> | C | C | 0.454 | 1.00 | 3.03E-08 | 0.57 |

|           |   |          |                  |   |   |       |      |          |      |
|-----------|---|----------|------------------|---|---|-------|------|----------|------|
| rs1335500 | 9 | 21711675 | <i>RN7SL151P</i> | G | G | 0.454 | 1.00 | 2.90E-08 | 0.56 |
| rs1335501 | 9 | 21711815 | <i>RN7SL151P</i> | C | C | 0.459 | 0.98 | 2.09E-08 | 0.63 |
| rs1335502 | 9 | 21736274 | <i>RN7SL151P</i> | A | A | 0.474 | 1.00 | 4.05E-09 | 0.46 |
| rs1335504 | 9 | 21743393 | <i>RN7SL151P</i> | C | C | 0.474 | 1.00 | 5.35E-09 | 0.48 |
| rs1335505 | 9 | 21748484 | <i>RN7SL151P</i> | C | C | 0.475 | 1.00 | 5.56E-09 | 0.49 |
| rs1335506 | 9 | 21750267 | <i>RN7SL151P</i> | G | G | 0.475 | 1.00 | 5.32E-09 | 0.48 |
| rs1335507 | 9 | 21750445 | <i>RN7SL151P</i> | C | C | 0.474 | 1.00 | 5.42E-09 | 0.48 |
| rs1335508 | 9 | 21750587 | <i>RN7SL151P</i> | T | T | 0.475 | 1.00 | 5.47E-09 | 0.48 |
| rs1335512 | 9 | 21761440 | <i>MTAP</i>      | C | C | 0.475 | 1.00 | 3.98E-09 | 0.44 |
| rs1345022 | 9 | 21785304 | <i>MTAP</i>      | C | C | 0.469 | 1.00 | 1.27E-09 | 0.27 |
| rs1345025 | 9 | 21745412 | <i>RN7SL151P</i> | G | G | 0.475 | 1.00 | 5.64E-09 | 0.48 |
| rs1345027 | 9 | 21751962 | <i>MTAP</i>      | A | A | 0.474 | 1.00 | 6.49E-09 | 0.45 |
| rs1345028 | 9 | 21752068 | <i>MTAP</i>      | G | G | 0.475 | 1.00 | 4.63E-09 | 0.47 |
| rs1372057 | 9 | 21747110 | <i>RN7SL151P</i> | T | T | 0.474 | 1.00 | 5.58E-09 | 0.48 |
| rs1372058 | 9 | 21747311 | <i>RN7SL151P</i> | G | G | 0.474 | 1.00 | 5.53E-09 | 0.48 |
| rs1372059 | 9 | 21747420 | <i>RN7SL151P</i> | C | C | 0.474 | 1.00 | 5.53E-09 | 0.48 |
| rs1414228 | 9 | 21773541 | <i>MTAP</i>      | A | A | 0.474 | 1.00 | 1.76E-09 | 0.39 |
| rs1414232 | 9 | 21711062 | <i>RN7SL151P</i> | G | G | 0.453 | 1.00 | 4.46E-08 | 0.60 |
| rs1414233 | 9 | 21711125 | <i>RN7SL151P</i> | C | C | 0.453 | 1.00 | 4.65E-08 | 0.60 |
| rs1414234 | 9 | 21712193 | <i>RN7SL151P</i> | C | C | 0.453 | 0.99 | 2.82E-08 | 0.55 |
| rs1414235 | 9 | 21726306 | <i>RN7SL151P</i> | G | G | 0.474 | 1.00 | 3.36E-09 | 0.44 |
| rs1414236 | 9 | 21732544 | <i>RN7SL151P</i> | C | C | 0.474 | 1.00 | 4.10E-09 | 0.46 |
| rs1414237 | 9 | 21732912 | <i>RN7SL151P</i> | G | G | 0.474 | 1.00 | 3.99E-09 | 0.46 |
| rs1414238 | 9 | 21737149 | <i>RN7SL151P</i> | C | C | 0.474 | 1.00 | 4.64E-09 | 0.48 |
| rs1414240 | 9 | 21743650 | <i>RN7SL151P</i> | G | G | 0.475 | 1.00 | 5.69E-09 | 0.48 |
| rs1414241 | 9 | 21744392 | <i>RN7SL151P</i> | G | G | 0.475 | 1.00 | 5.67E-09 | 0.48 |
| rs1414242 | 9 | 21748239 | <i>RN7SL151P</i> | T | T | 0.478 | 1.00 | 4.65E-09 | 0.69 |
| rs1414244 | 9 | 21748532 | <i>RN7SL151P</i> | A | A | 0.475 | 1.00 | 5.81E-09 | 0.48 |

|             |   |          |                  |   |   |       |      |          |      |
|-------------|---|----------|------------------|---|---|-------|------|----------|------|
| rs1414245   | 9 | 21750069 | <i>RN7SL151P</i> | A | A | 0.475 | 1.00 | 5.50E-09 | 0.48 |
| rs1414246   | 9 | 21750075 | <i>RN7SL151P</i> | A | A | 0.475 | 1.00 | 5.48E-09 | 0.48 |
| rs1414247   | 9 | 21750170 | <i>RN7SL151P</i> | T | T | 0.475 | 1.00 | 5.26E-09 | 0.47 |
| rs1414248   | 9 | 21750884 | <i>RN7SL151P</i> | C | C | 0.475 | 1.00 | 5.47E-09 | 0.48 |
| rs1414249   | 9 | 21750980 | <i>RN7SL151P</i> | T | T | 0.475 | 1.00 | 7.36E-09 | 0.47 |
| rs1414250   | 9 | 21754947 | <i>MTAP</i>      | T | T | 0.475 | 1.00 | 4.83E-09 | 0.47 |
| rs1414251   | 9 | 21755030 | <i>MTAP</i>      | A | A | 0.475 | 1.00 | 4.80E-09 | 0.47 |
| rs1414252   | 9 | 21755140 | <i>MTAP</i>      | C | C | 0.475 | 1.00 | 4.69E-09 | 0.47 |
| rs1414255   | 9 | 21755894 | <i>MTAP</i>      | A | A | 0.476 | 1.00 | 4.77E-09 | 0.48 |
| rs1414256   | 9 | 21755896 | <i>MTAP</i>      | G | G | 0.479 | 0.98 | 4.81E-09 | 0.43 |
| rs1414257   | 9 | 21757767 | <i>MTAP</i>      | T | T | 0.474 | 1.00 | 4.55E-09 | 0.47 |
| rs143899253 | 9 | 21698799 | <i>RN7SL151P</i> | C | C | 0.481 | 0.94 | 1.05E-08 | 0.90 |
| rs1452658   | 9 | 21700795 | <i>RN7SL151P</i> | G | G | 0.461 | 0.99 | 3.84E-09 | 0.64 |
| rs145511817 | 9 | 21702286 | <i>RN7SL151P</i> | A | A | 0.462 | 0.99 | 5.78E-09 | 0.68 |
| rs1542074   | 9 | 21786304 | <i>MTAP</i>      | C | C | 0.469 | 1.00 | 1.25E-09 | 0.26 |
| rs1542075   | 9 | 21790669 | <i>MTAP</i>      | C | C | 0.469 | 0.99 | 9.92E-10 | 0.20 |
| rs1542076   | 9 | 21790755 | <i>MTAP</i>      | A | A | 0.480 | 0.99 | 5.03E-10 | 0.24 |
| rs1556696   | 9 | 21741985 | <i>RN7SL151P</i> | C | C | 0.475 | 1.00 | 5.69E-09 | 0.48 |
| rs1556697   | 9 | 21741993 | <i>RN7SL151P</i> | A | A | 0.475 | 1.00 | 8.38E-09 | 0.47 |
| rs1561651   | 9 | 21742746 | <i>RN7SL151P</i> | T | T | 0.475 | 1.00 | 5.63E-09 | 0.48 |
| rs1561652   | 9 | 21742816 | <i>RN7SL151P</i> | T | T | 0.475 | 1.00 | 5.62E-09 | 0.48 |
| rs1832075   | 9 | 21726490 | <i>RN7SL151P</i> | A | A | 0.474 | 1.00 | 3.35E-09 | 0.44 |
| rs1832076   | 9 | 21726664 | <i>RN7SL151P</i> | A | A | 0.474 | 1.00 | 3.34E-09 | 0.44 |
| rs1840050   | 9 | 21700530 | <i>RN7SL151P</i> | C | C | 0.462 | 0.99 | 4.59E-09 | 0.67 |
| rs1889680   | 9 | 21695460 | <i>KHSRPP1</i>   | T | T | 0.461 | 0.98 | 1.10E-09 | 0.76 |
| rs1932236   | 9 | 21725149 | <i>RN7SL151P</i> | G | G | 0.474 | 1.00 | 3.53E-09 | 0.44 |
| rs1932237   | 9 | 21758768 | <i>MTAP</i>      | G | G | 0.474 | 1.00 | 4.29E-09 | 0.44 |
| rs1965153   | 9 | 21752105 | <i>MTAP</i>      | T | T | 0.475 | 1.00 | 4.74E-09 | 0.47 |

|            |   |          |                  |   |   |       |      |          |      |
|------------|---|----------|------------------|---|---|-------|------|----------|------|
| rs2004627  | 9 | 21707492 | <i>RN7SL151P</i> | C | C | 0.455 | 1.00 | 2.33E-08 | 0.49 |
| rs2027162  | 9 | 21737916 | <i>RN7SL151P</i> | A | A | 0.474 | 1.00 | 5.91E-09 | 0.49 |
| rs2027163  | 9 | 21738133 | <i>RN7SL151P</i> | T | T | 0.474 | 1.00 | 5.17E-09 | 0.47 |
| rs2043991  | 9 | 21731081 | <i>RN7SL151P</i> | A | A | 0.474 | 1.00 | 3.78E-09 | 0.46 |
| rs2119465  | 9 | 21723709 | <i>RN7SL151P</i> | T | T | 0.475 | 1.00 | 2.46E-09 | 0.39 |
| rs2119466  | 9 | 21745990 | <i>RN7SL151P</i> | T | T | 0.475 | 1.00 | 5.68E-09 | 0.48 |
| rs2119467  | 9 | 21746107 | <i>RN7SL151P</i> | C | C | 0.474 | 1.00 | 5.60E-09 | 0.48 |
| rs2152272  | 9 | 21773416 | <i>MTAP</i>      | A | A | 0.474 | 1.00 | 1.75E-09 | 0.39 |
| rs2152273  | 9 | 21773347 | <i>MTAP</i>      | C | C | 0.475 | 0.99 | 2.95E-09 | 0.38 |
| rs2165408  | 9 | 21802469 | <i>MTAP</i>      | A | G | 0.457 | 0.93 | 1.63E-08 | 0.51 |
| rs2165411  | 9 | 21730818 | <i>RN7SL151P</i> | T | T | 0.474 | 1.00 | 3.75E-09 | 0.46 |
| rs2184551  | 9 | 21773222 | <i>MTAP</i>      | A | A | 0.475 | 0.99 | 2.55E-09 | 0.38 |
| rs2210777  | 9 | 21721455 | <i>RN7SL151P</i> | A | A | 0.475 | 1.00 | 2.67E-09 | 0.39 |
| rs2210778  | 9 | 21721585 | <i>RN7SL151P</i> | C | C | 0.475 | 1.00 | 2.85E-09 | 0.39 |
| rs2210780  | 9 | 21721714 | <i>RN7SL151P</i> | G | G | 0.475 | 1.00 | 2.67E-09 | 0.39 |
| rs2218220  | 9 | 21756089 | <i>MTAP</i>      | C | C | 0.475 | 1.00 | 4.81E-09 | 0.47 |
| rs2383186  | 9 | 21728051 | <i>RN7SL151P</i> | T | T | 0.474 | 1.00 | 5.76E-09 | 0.48 |
| rs2383202  | 9 | 21710215 | <i>RN7SL151P</i> | C | C | 0.453 | 1.00 | 4.58E-08 | 0.60 |
| rs2891159  | 9 | 21747672 | <i>RN7SL151P</i> | G | G | 0.474 | 1.00 | 5.60E-09 | 0.48 |
| rs2891160  | 9 | 21732999 | <i>RN7SL151P</i> | C | C | 0.474 | 1.00 | 4.79E-09 | 0.46 |
| rs2891161  | 9 | 21728291 | <i>RN7SL151P</i> | C | C | 0.474 | 1.00 | 3.19E-09 | 0.44 |
| rs2891164  | 9 | 21711735 | <i>RN7SL151P</i> | C | C | 0.453 | 1.00 | 2.24E-08 | 0.55 |
| rs2891165  | 9 | 21711801 | <i>RN7SL151P</i> | G | G | 0.460 | 0.98 | 1.11E-08 | 0.62 |
| rs2891166  | 9 | 21726819 | <i>RN7SL151P</i> | C | C | 0.474 | 1.00 | 3.34E-09 | 0.44 |
| rs34435506 | 9 | 21743330 | <i>RN7SL151P</i> | C | C | 0.475 | 1.00 | 5.59E-09 | 0.48 |
| rs35974503 | 9 | 21741129 | <i>RN7SL151P</i> | A | A | 0.478 | 0.99 | 6.06E-09 | 0.55 |
| rs3849929  | 9 | 21769412 | <i>MTAP</i>      | G | G | 0.474 | 1.00 | 1.92E-09 | 0.39 |
| rs3927737  | 9 | 21827992 | <i>MTAP</i>      | G | G | 0.470 | 0.99 | 6.14E-09 | 0.38 |

|             |   |          |                  |   |   |       |      |          |      |
|-------------|---|----------|------------------|---|---|-------|------|----------|------|
| rs4275294   | 9 | 21727225 | <i>RN7SL151P</i> | A | A | 0.474 | 1.00 | 3.33E-09 | 0.44 |
| rs4300088   | 9 | 21755266 | <i>MTAP</i>      | C | C | 0.475 | 1.00 | 4.82E-09 | 0.47 |
| rs4341236   | 9 | 21727208 | <i>RN7SL151P</i> | A | A | 0.474 | 1.00 | 3.33E-09 | 0.44 |
| rs4350062   | 9 | 21733008 | <i>RN7SL151P</i> | T | T | 0.474 | 1.00 | 4.80E-09 | 0.46 |
| rs4352937   | 9 | 21747749 | <i>RN7SL151P</i> | C | C | 0.474 | 1.00 | 5.60E-09 | 0.48 |
| rs4364717   | 9 | 21801530 | <i>MTAP</i>      | A | G | 0.456 | 0.99 | 4.83E-08 | 0.25 |
| rs4384075   | 9 | 21736034 | <i>RN7SL151P</i> | G | G | 0.475 | 1.00 | 3.93E-09 | 0.42 |
| rs4431674   | 9 | 21822483 | <i>MTAP</i>      | G | G | 0.470 | 0.99 | 2.30E-09 | 0.30 |
| rs4560881   | 9 | 21700409 | <i>RN7SL151P</i> | A | A | 0.461 | 0.99 | 3.28E-09 | 0.69 |
| rs4595216   | 9 | 21719872 | <i>RN7SL151P</i> | G | G | 0.475 | 1.00 | 3.27E-09 | 0.39 |
| rs4620362   | 9 | 21711788 | <i>RN7SL151P</i> | A | A | 0.461 | 0.98 | 1.73E-08 | 0.65 |
| rs4620363   | 9 | 21711789 | <i>RN7SL151P</i> | A | A | 0.457 | 0.99 | 7.56E-09 | 0.52 |
| rs4636294   | 9 | 21747803 | <i>RN7SL151P</i> | A | A | 0.474 | 1.00 | 5.63E-09 | 0.47 |
| rs4637939   | 9 | 21727963 | <i>RN7SL151P</i> | T | T | 0.474 | 1.00 | 3.17E-09 | 0.44 |
| rs5009176   | 9 | 21726573 | <i>RN7SL151P</i> | T | T | 0.474 | 1.00 | 1.01E-08 | 0.50 |
| rs5009177   | 9 | 21726572 | <i>RN7SL151P</i> | A | A | 0.474 | 1.00 | 1.01E-08 | 0.50 |
| rs5009178   | 9 | 21726571 | <i>RN7SL151P</i> | C | C | 0.474 | 1.00 | 1.01E-08 | 0.50 |
| rs55948515  | 9 | 21696979 | <i>KHSRPP1</i>   | C | C | 0.463 | 0.97 | 4.61E-09 | 0.67 |
| rs568707466 | 9 | 21698955 | <i>RN7SL151P</i> | C | C | 0.477 | 0.96 | 5.10E-09 | 0.69 |
| rs5896948   | 9 | 21726628 | <i>RN7SL151P</i> | T | T | 0.474 | 1.00 | 5.45E-09 | 0.50 |
| rs6475549   | 9 | 21700927 | <i>RN7SL151P</i> | A | A | 0.462 | 0.99 | 3.35E-09 | 0.67 |
| rs6475550   | 9 | 21701451 | <i>RN7SL151P</i> | A | A | 0.462 | 0.99 | 3.26E-09 | 0.68 |
| rs6475551   | 9 | 21701639 | <i>RN7SL151P</i> | A | A | 0.462 | 0.99 | 3.19E-09 | 0.68 |
| rs6475552   | 9 | 21701674 | <i>RN7SL151P</i> | G | G | 0.462 | 0.99 | 3.50E-09 | 0.68 |
| rs6475554   | 9 | 21716887 | <i>RN7SL151P</i> | T | A | 0.486 | 0.99 | 3.09E-09 | 0.19 |
| rs6475555   | 9 | 21716997 | <i>RN7SL151P</i> | A | G | 0.486 | 0.99 | 3.01E-09 | 0.20 |
| rs6475556   | 9 | 21718297 | <i>RN7SL151P</i> | T | T | 0.475 | 1.00 | 2.85E-09 | 0.40 |
| rs6475557   | 9 | 21718479 | <i>RN7SL151P</i> | A | A | 0.475 | 1.00 | 3.17E-09 | 0.39 |

|            |   |          |                  |   |   |       |      |          |      |
|------------|---|----------|------------------|---|---|-------|------|----------|------|
| rs6475558  | 9 | 21718639 | <i>RN7SL151P</i> | A | A | 0.475 | 1.00 | 3.21E-09 | 0.39 |
| rs6475559  | 9 | 21718655 | <i>RN7SL151P</i> | T | T | 0.475 | 1.00 | 3.21E-09 | 0.39 |
| rs6475561  | 9 | 21725649 | <i>RN7SL151P</i> | A | A | 0.474 | 1.00 | 3.25E-09 | 0.44 |
| rs6475562  | 9 | 21725765 | <i>RN7SL151P</i> | C | C | 0.474 | 1.00 | 3.84E-09 | 0.44 |
| rs6475563  | 9 | 21726778 | <i>RN7SL151P</i> | G | G | 0.474 | 1.00 | 3.34E-09 | 0.44 |
| rs6475564  | 9 | 21728683 | <i>RN7SL151P</i> | T | T | 0.474 | 1.00 | 3.37E-09 | 0.44 |
| rs6475565  | 9 | 21731867 | <i>RN7SL151P</i> | G | G | 0.474 | 1.00 | 4.56E-09 | 0.49 |
| rs6475566  | 9 | 21733500 | <i>RN7SL151P</i> | G | G | 0.474 | 1.00 | 4.06E-09 | 0.46 |
| rs6475568  | 9 | 21733706 | <i>RN7SL151P</i> | G | G | 0.474 | 1.00 | 4.10E-09 | 0.46 |
| rs6475569  | 9 | 21733889 | <i>RN7SL151P</i> | A | A | 0.474 | 1.00 | 4.08E-09 | 0.46 |
| rs6475571  | 9 | 21736017 | <i>RN7SL151P</i> | C | C | 0.474 | 1.00 | 4.94E-09 | 0.48 |
| rs6475572  | 9 | 21736020 | <i>RN7SL151P</i> | T | T | 0.474 | 1.00 | 4.96E-09 | 0.48 |
| rs6475574  | 9 | 21736052 | <i>RN7SL151P</i> | C | C | 0.475 | 1.00 | 3.73E-09 | 0.42 |
| rs6475576  | 9 | 21765601 | <i>MTAP</i>      | C | C | 0.475 | 1.00 | 3.72E-09 | 0.39 |
| rs6475577  | 9 | 21769869 | <i>MTAP</i>      | T | T | 0.474 | 0.99 | 2.22E-09 | 0.39 |
| rs6475578  | 9 | 21769897 | <i>MTAP</i>      | G | G | 0.474 | 1.00 | 1.70E-09 | 0.40 |
| rs6475579  | 9 | 21771756 | <i>MTAP</i>      | A | A | 0.475 | 1.00 | 2.67E-09 | 0.38 |
| rs6475585  | 9 | 21826538 | <i>MTAP</i>      | G | G | 0.471 | 0.99 | 5.79E-09 | 0.37 |
| rs66922395 | 9 | 21702293 | <i>RN7SL151P</i> | G | G | 0.460 | 0.99 | 6.31E-09 | 0.66 |
| rs7018772  | 9 | 21787402 | <i>MTAP</i>      | G | G | 0.469 | 1.00 | 1.15E-09 | 0.26 |
| rs7019601  | 9 | 21741797 | <i>RN7SL151P</i> | T | T | 0.475 | 1.00 | 5.65E-09 | 0.48 |
| rs7021012  | 9 | 21775957 | <i>MTAP</i>      | G | G | 0.474 | 1.00 | 1.97E-09 | 0.38 |
| rs7021538  | 9 | 21733204 | <i>RN7SL151P</i> | C | C | 0.474 | 1.00 | 4.72E-09 | 0.46 |
| rs7022856  | 9 | 21788523 | <i>MTAP</i>      | A | A | 0.469 | 1.00 | 1.07E-09 | 0.25 |
| rs7023299  | 9 | 21728406 | <i>RN7SL151P</i> | G | G | 0.474 | 1.00 | 3.28E-09 | 0.43 |
| rs7024027  | 9 | 21772930 | <i>MTAP</i>      | T | T | 0.475 | 0.99 | 2.66E-09 | 0.38 |
| rs7027989  | 9 | 21817754 | <i>MTAP</i>      | A | A | 0.469 | 1.00 | 3.19E-09 | 0.34 |
| rs7028913  | 9 | 21717395 | <i>RN7SL151P</i> | A | A | 0.475 | 1.00 | 3.12E-09 | 0.40 |



|            |   |          |                           |   |   |       |      |          |      |
|------------|---|----------|---------------------------|---|---|-------|------|----------|------|
| rs7029040  | 9 | 21717441 | <i>RN7SL151P</i>          | A | A | 0.475 | 1.00 | 3.15E-09 | 0.40 |
| rs7029166  | 9 | 21717509 | <i>RN7SL151P</i>          | A | A | 0.475 | 0.99 | 2.90E-09 | 0.40 |
| rs7029274  | 9 | 21717599 | <i>RN7SL151P</i>          | A | A | 0.475 | 1.00 | 3.03E-09 | 0.40 |
| rs7033503  | 9 | 21799598 | <i>MTAP</i>               | T | T | 0.466 | 0.99 | 2.52E-10 | 0.19 |
| rs7036249  | 9 | 21745114 | <i>RN7SL151P</i>          | T | T | 0.475 | 1.00 | 5.66E-09 | 0.48 |
| rs7036257  | 9 | 21745120 | <i>RN7SL151P</i>          | T | T | 0.475 | 1.00 | 5.64E-09 | 0.48 |
| rs7037577  | 9 | 21772037 | <i>MTAP</i>               | G | G | 0.474 | 1.00 | 1.91E-09 | 0.39 |
| rs7038708  | 9 | 21788081 | <i>MTAP</i>               | T | T | 0.468 | 1.00 | 1.23E-09 | 0.25 |
| rs7039487  | 9 | 21709997 | <i>MTAP</i>               | C | C | 0.453 | 1.00 | 4.56E-08 | 0.60 |
| rs7040998  | 9 | 21725512 | <i>RN7SL151P</i>          | C | C | 0.474 | 1.00 | 3.51E-09 | 0.44 |
| rs7041104  | 9 | 21725430 | <i>RN7SL151P</i>          | G | G | 0.475 | 1.00 | 2.48E-09 | 0.39 |
| rs7043827  | 9 | 21731447 | <i>RN7SL151P</i>          | A | A | 0.474 | 1.00 | 3.93E-09 | 0.46 |
| rs7044070  | 9 | 21731586 | <i>RN7SL151P</i>          | C | C | 0.474 | 1.00 | 4.65E-09 | 0.49 |
| rs7044199  | 9 | 21731694 | <i>RN7SL151P</i>          | C | C | 0.474 | 1.00 | 4.56E-09 | 0.49 |
| rs7045768  | 9 | 21770709 | <i>MTAP</i>               | T | T | 0.474 | 1.00 | 1.80E-09 | 0.39 |
| rs7047136  | 9 | 21704021 | <i>RN7SL151P</i>          | A | A | 0.454 | 0.99 | 1.30E-08 | 0.43 |
| rs71334592 | 9 | 21699618 | <i>RN7SL151P</i>          | T | T | 0.469 | 0.96 | 3.24E-09 | 0.56 |
| rs71334597 | 9 | 21741166 | <i>RN7SL151P</i>          | A | A | 0.491 | 0.97 | 1.63E-08 | 0.42 |
| rs72691561 | 9 | 21813241 | <i>MTAP, RP11-145E5.5</i> | T | C | 0.446 | 0.99 | 3.06E-08 | 0.63 |
| rs72691562 | 9 | 21813303 | <i>MTAP, RP11-145E5.5</i> | A | C | 0.446 | 0.99 | 3.07E-08 | 0.63 |
| rs72691563 | 9 | 21813495 | <i>MTAP, RP11-145E5.5</i> | C | T | 0.444 | 0.99 | 1.41E-08 | 0.58 |
| rs72691564 | 9 | 21813518 | <i>MTAP, RP11-145E5.5</i> | C | T | 0.446 | 0.99 | 2.92E-08 | 0.63 |
| rs751173   | 9 | 21707372 | <i>RN7SL151P</i>          | C | C | 0.455 | 1.00 | 4.06E-08 | 0.45 |
| rs7846749  | 9 | 21780251 | <i>MTAP</i>               | A | A | 0.469 | 1.00 | 1.79E-09 | 0.29 |
| rs7846852  | 9 | 21718193 | <i>RN7SL151P</i>          | T | T | 0.475 | 1.00 | 2.85E-09 | 0.40 |
| rs7846943  | 9 | 21720108 | <i>RN7SL151P</i>          | C | C | 0.475 | 1.00 | 3.51E-09 | 0.39 |
| rs7847070  | 9 | 21720225 | <i>RN7SL151P</i>          | C | C | 0.475 | 1.00 | 2.69E-09 | 0.42 |
| rs7847574  | 9 | 21720481 | <i>RN7SL151P</i>          | G | G | 0.475 | 1.00 | 2.95E-09 | 0.42 |

|           |   |          |                           |   |   |       |      |          |      |
|-----------|---|----------|---------------------------|---|---|-------|------|----------|------|
| rs7848230 | 9 | 21720921 | <i>RN7SL151P</i>          | G | G | 0.475 | 1.00 | 2.68E-09 | 0.39 |
| rs7850446 | 9 | 21763742 | <i>MTAP</i>               | G | G | 0.474 | 1.00 | 3.71E-09 | 0.44 |
| rs7851439 | 9 | 21721248 | <i>RN7SL151P</i>          | G | G | 0.475 | 1.00 | 3.24E-09 | 0.39 |
| rs7851460 | 9 | 21719507 | <i>RN7SL151P</i>          | T | T | 0.475 | 1.00 | 3.21E-09 | 0.39 |
| rs7852450 | 9 | 21825075 | <i>MTAP, RP11-145E5.5</i> | T | T | 0.465 | 0.99 | 9.22E-09 | 0.31 |
| rs7852710 | 9 | 21760254 | <i>MTAP</i>               | T | T | 0.474 | 1.00 | 4.21E-09 | 0.44 |
| rs7852900 | 9 | 21746796 | <i>RN7SL151P</i>          | A | A | 0.474 | 1.00 | 5.58E-09 | 0.48 |
| rs7853131 | 9 | 21746976 | <i>RN7SL151P</i>          | A | A | 0.474 | 1.00 | 5.52E-09 | 0.48 |
| rs7854018 | 9 | 21734366 | <i>RN7SL151P</i>          | C | C | 0.474 | 1.00 | 4.02E-09 | 0.46 |
| rs7854222 | 9 | 21734348 | <i>RN7SL151P</i>          | G | G | 0.474 | 1.00 | 3.69E-09 | 0.46 |
| rs7854990 | 9 | 21725962 | <i>RN7SL151P</i>          | T | T | 0.474 | 1.00 | 4.00E-09 | 0.45 |
| rs7855242 | 9 | 21729327 | <i>RN7SL151P</i>          | C | C | 0.474 | 1.00 | 6.31E-09 | 0.47 |
| rs7855253 | 9 | 21729366 | <i>RN7SL151P</i>          | C | C | 0.474 | 1.00 | 4.35E-09 | 0.46 |
| rs7855464 | 9 | 21729383 | <i>RN7SL151P</i>          | G | G | 0.474 | 1.00 | 4.46E-09 | 0.46 |
| rs7856941 | 9 | 21761322 | <i>MTAP</i>               | T | T | 0.475 | 1.00 | 3.90E-09 | 0.44 |
| rs7857279 | 9 | 21717884 | <i>RN7SL151P</i>          | A | A | 0.475 | 1.00 | 2.85E-09 | 0.40 |
| rs7857636 | 9 | 21700172 | <i>RN7SL151P</i>          | A | A | 0.462 | 0.99 | 3.39E-09 | 0.68 |
| rs7858959 | 9 | 21700932 | <i>RN7SL151P</i>          | G | G | 0.462 | 0.99 | 3.18E-09 | 0.68 |
| rs7858991 | 9 | 21735856 | <i>RN7SL151P</i>          | G | G | 0.474 | 1.00 | 3.45E-09 | 0.45 |
| rs7860576 | 9 | 21714920 | <i>RN7SL151P</i>          | T | C | 0.493 | 0.99 | 3.12E-09 | 0.16 |
| rs7865156 | 9 | 21719375 | <i>RN7SL151P</i>          | G | G | 0.475 | 1.00 | 3.25E-09 | 0.39 |
| rs7865620 | 9 | 21719996 | <i>RN7SL151P</i>          | A | A | 0.475 | 1.00 | 3.40E-09 | 0.39 |
| rs7866540 | 9 | 21760396 | <i>MTAP</i>               | C | C | 0.476 | 1.00 | 4.44E-09 | 0.44 |
| rs7866787 | 9 | 21760639 | <i>MTAP</i>               | A | A | 0.476 | 1.00 | 4.92E-09 | 0.44 |
| rs7866885 | 9 | 21760621 | <i>MTAP</i>               | C | C | 0.475 | 1.00 | 4.79E-09 | 0.44 |
| rs7867994 | 9 | 21697689 | <i>KHSRPP1</i>            | G | G | 0.461 | 0.98 | 8.97E-09 | 0.71 |
| rs7868008 | 9 | 21697805 | <i>KHSRPP1</i>            | C | C | 0.463 | 0.98 | 7.74E-09 | 0.65 |
| rs7868091 | 9 | 21697699 | <i>KHSRPP1</i>            | G | G | 0.461 | 0.98 | 7.11E-09 | 0.69 |

|             |    |          |                           |   |   |       |      |          |      |
|-------------|----|----------|---------------------------|---|---|-------|------|----------|------|
| rs7871138   | 9  | 21722453 | <i>RN7SL151P</i>          | T | T | 0.475 | 1.00 | 2.66E-09 | 0.39 |
| rs7871242   | 9  | 21722521 | <i>RN7SL151P</i>          | T | T | 0.470 | 0.99 | 1.07E-08 | 0.60 |
| rs7871256   | 9  | 21722562 | <i>RN7SL151P</i>          | T | T | 0.475 | 0.99 | 2.67E-09 | 0.40 |
| rs7871345   | 9  | 21729895 | <i>RN7SL151P</i>          | T | T | 0.474 | 1.00 | 3.58E-09 | 0.45 |
| rs7874319   | 9  | 21735881 | <i>RN7SL151P</i>          | T | T | 0.474 | 1.00 | 3.45E-09 | 0.45 |
| rs796910922 | 9  | 21720827 | <i>RN7SL151P</i>          | G | G | 0.476 | 0.99 | 4.75E-09 | 0.65 |
| rs80138396  | 9  | 21805208 | <i>MTAP, RP11-145E5.5</i> | C | C | 0.476 | 0.99 | 2.63E-10 | 0.23 |
| rs869329    | 9  | 21804693 | <i>MTAP, RP11-145E5.5</i> | A | A | 0.476 | 1.00 | 1.98E-10 | 0.24 |
| rs869330    | 9  | 21804617 | <i>MTAP, RP11-145E5.5</i> | A | A | 0.476 | 1.00 | 2.37E-10 | 0.24 |
| rs871024    | 9  | 21803880 | <i>MTAP, RP11-145E5.5</i> | C | C | 0.476 | 1.00 | 2.07E-10 | 0.23 |
| rs9298821   | 9  | 21699406 | <i>RN7SL151P</i>          | G | G | 0.461 | 0.99 | 4.64E-09 | 0.68 |
| rs9298822   | 9  | 21699444 | <i>RN7SL151P</i>          | C | C | 0.461 | 0.99 | 4.57E-09 | 0.67 |
| rs9298823   | 9  | 21749607 | <i>RN7SL151P</i>          | T | T | 0.475 | 1.00 | 5.99E-09 | 0.48 |
| rs9298824   | 9  | 21749663 | <i>RN7SL151P</i>          | T | T | 0.474 | 1.00 | 5.73E-09 | 0.46 |
| rs9298825   | 9  | 21749670 | <i>RN7SL151P</i>          | T | T | 0.475 | 1.00 | 8.57E-09 | 0.47 |
| rs935053    | 9  | 21783922 | <i>MTAP</i>               | G | G | 0.469 | 1.00 | 1.27E-09 | 0.26 |
| rs935055    | 9  | 21803183 | <i>MTAP, RP11-145E5.5</i> | G | G | 0.476 | 1.00 | 2.22E-10 | 0.22 |
| rs950770    | 9  | 21741662 | <i>RN7SL151P</i>          | C | C | 0.474 | 1.00 | 5.61E-09 | 0.48 |
| rs9644821   | 9  | 21741197 | <i>RN7SL151P</i>          | C | C | 0.477 | 1.00 | 1.25E-08 | 0.49 |
| rs9644858   | 9  | 21741050 | <i>RN7SL151P</i>          | C | C | 0.475 | 1.00 | 5.75E-09 | 0.48 |
| rs9695494   | 9  | 21727799 | <i>RN7SL151P</i>          | C | C | 0.474 | 1.00 | 3.43E-09 | 0.44 |
| rs9886831   | 9  | 21773167 | <i>MTAP</i>               | C | C | 0.475 | 0.99 | 2.69E-09 | 0.39 |
| rs11076649  | 16 | 90059336 | <i>AFG3L1P</i>            | C | G | 0.170 | 0.99 | 6.47E-10 | 0.05 |
| rs111460975 | 16 | 89434541 | <i>ANKRD11</i>            | A | G | 0.142 | 1.00 | 4.24E-08 | 0.65 |
| rs111822773 | 16 | 90054089 | <i>AFG3L1P</i>            | A | C | 0.109 | 0.98 | 3.62E-09 | 0.04 |
| rs112001009 | 16 | 90047605 | <i>AFG3L1P</i>            | A | G | 0.106 | 1.00 | 3.06E-09 | 0.05 |
| rs112119225 | 16 | 90063461 | <i>AFG3L1P</i>            | T | G | 0.096 | 1.00 | 1.67E-11 | 0.06 |
| rs112153252 | 16 | 90059712 | <i>AFG3L1P</i>            | A | G | 0.107 | 0.99 | 6.22E-09 | 0.05 |

|             |    |          |                |   |   |       |      |          |      |
|-------------|----|----------|----------------|---|---|-------|------|----------|------|
| rs112233725 | 16 | 89693191 | <i>DPEP1</i>   | T | C | 0.088 | 0.95 | 1.96E-08 | 0.26 |
| rs112460025 | 16 | 90051337 | <i>AFG3L1P</i> | T | G | 0.095 | 1.00 | 8.68E-12 | 0.06 |
| rs112556696 | 16 | 90054018 | <i>AFG3L1P</i> | A | G | 0.110 | 0.96 | 5.52E-09 | 0.09 |
| rs113178244 | 16 | 90056195 | <i>AFG3L1P</i> | C | G | 0.107 | 0.99 | 5.00E-09 | 0.05 |
| rs113753049 | 16 | 90052934 | <i>AFG3L1P</i> | A | C | 0.321 | 0.96 | 8.55E-09 | 0.43 |
| rs113891247 | 16 | 90047757 | <i>AFG3L1P</i> | T | A | 0.091 | 1.00 | 1.43E-11 | 0.07 |
| rs113923060 | 16 | 90054015 | <i>AFG3L1P</i> | G | A | 0.096 | 0.99 | 1.11E-11 | 0.05 |
| rs113955373 | 16 | 90043036 | <i>AFG3L1P</i> | C | A | 0.089 | 0.98 | 1.13E-10 | 0.11 |
| rs113955902 | 16 | 89395438 | <i>ANKRD11</i> | G | A | 0.077 | 0.97 | 1.10E-09 | 0.22 |
| rs11648898  | 16 | 90045986 | <i>AFG3L1P</i> | A | G | 0.170 | 1.00 | 5.87E-13 | 0.18 |
| rs11866420  | 16 | 90054704 | <i>AFG3L1P</i> | C | C | 0.422 | 0.99 | 6.14E-12 | 0.08 |
| rs12921383  | 16 | 89859753 | <i>FANCA</i>   | T | C | 0.111 | 0.99 | 7.39E-09 | 0.15 |
| rs12924124  | 16 | 89791126 | <i>ZNF276</i>  | C | T | 0.095 | 1.00 | 1.83E-10 | 0.22 |
| rs12925026  | 16 | 89792856 | <i>ZNF276</i>  | C | T | 0.095 | 1.00 | 1.47E-10 | 0.21 |
| rs12931267  | 16 | 89818732 | <i>FANCA</i>   | C | G | 0.097 | 1.00 | 5.79E-11 | 0.24 |
| rs146972365 | 16 | 90022693 | <i>DEF8</i>    | T | C | 0.091 | 0.99 | 5.27E-12 | 0.06 |
| rs164741    | 16 | 89692298 | <i>DPEP1</i>   | A | A | 0.336 | 0.98 | 7.83E-09 | 0.53 |
| rs164752    | 16 | 89722390 | <i>CHMP1A</i>  | G | G | 0.118 | 0.99 | 2.16E-08 | 0.40 |
| rs1805007   | 16 | 89986117 | <i>MC1R</i>    | C | T | 0.098 | 1.00 | 5.31E-13 | 0.30 |
| rs1991508   | 16 | 89672155 | <i>DPEP1</i>   | C | T | 0.091 | 0.99 | 3.08E-09 | 0.33 |
| rs2280374   | 16 | 89687407 | <i>DPEP1</i>   | C | T | 0.099 | 1.00 | 1.43E-10 | 0.17 |
| rs258322    | 16 | 89755903 | <i>CDK10</i>   | A | A | 0.121 | 1.00 | 3.95E-08 | 0.27 |
| rs34265416  | 16 | 89769725 | <i>SPATA2L</i> | C | A | 0.114 | 0.99 | 3.89E-08 | 0.24 |
| rs34323930  | 16 | 89691045 | <i>DPEP1</i>   | C | T | 0.098 | 0.99 | 1.27E-10 | 0.16 |
| rs34395984  | 16 | 89659511 | <i>CPNE7</i>   | C | T | 0.086 | 0.99 | 9.24E-11 | 0.28 |
| rs34659644  | 16 | 89796017 | <i>ZNF276</i>  | G | A | 0.095 | 0.99 | 2.46E-10 | 0.22 |
| rs34714188  | 16 | 89781756 | <i>VPS9D1</i>  | T | A | 0.096 | 0.99 | 3.94E-10 | 0.24 |
| rs34934239  | 16 | 89675579 | <i>DPEP1</i>   | G | A | 0.098 | 0.99 | 1.04E-11 | 0.22 |

|             |    |          |                   |    |   |       |      |          |      |
|-------------|----|----------|-------------------|----|---|-------|------|----------|------|
| rs35026726  | 16 | 89791279 | <i>ZNF276</i>     | C  | T | 0.095 | 1.00 | 1.38E-10 | 0.21 |
| rs35063026  | 16 | 89736157 | <i>SPATA33</i>    | C  | T | 0.095 | 0.99 | 3.19E-09 | 0.26 |
| rs35414122  | 16 | 89742979 | <i>CDK10</i>      | A  | G | 0.114 | 0.99 | 2.87E-08 | 0.28 |
| rs35749174  | 16 | 89716493 | <i>CHMP1A</i>     | G  | A | 0.096 | 0.99 | 1.97E-09 | 0.28 |
| rs35850949  | 16 | 89720724 | <i>CHMP1A</i>     | C  | A | 0.096 | 0.99 | 3.04E-09 | 0.28 |
| rs369230    | 16 | 89645437 | <i>CPNE7</i>      | G  | G | 0.310 | 0.98 | 1.03E-09 | 0.64 |
| rs375738481 | 16 | 89744876 | <i>CDK10</i>      | CT | C | 0.158 | 0.91 | 9.37E-10 | 0.21 |
| rs3764253   | 16 | 89686693 | <i>DPEP1</i>      | G  | A | 0.099 | 1.00 | 1.51E-10 | 0.81 |
| rs3803683   | 16 | 90060281 | <i>AFG3LIP</i>    | T  | C | 0.175 | 0.99 | 3.55E-10 | 0.05 |
| rs4248913   | 16 | 89693099 | <i>DPEP1</i>      | C  | A | 0.100 | 0.93 | 1.61E-08 | 0.34 |
| rs4268748   | 16 | 90026512 | <i>DEF8</i>       | T  | C | 0.309 | 0.99 | 3.03E-12 | 0.27 |
| rs452176    | 16 | 89653032 | <i>CPNE7</i>      | G  | G | 0.459 | 0.96 | 3.90E-08 | 0.83 |
| rs45610233  | 16 | 90048395 | <i>AFG3LIP</i>    | C  | T | 0.087 | 1.00 | 4.55E-11 | 0.12 |
| rs4968051   | 16 | 89714981 | <i>CHMP1A</i>     | T  | C | 0.108 | 0.99 | 3.56E-08 | 0.22 |
| rs4968054   | 16 | 89690079 | <i>DPEP1</i>      | C  | T | 0.099 | 1.00 | 1.25E-10 | 0.16 |
| rs533139343 | 16 | 90286407 | <i>AC137934.1</i> | C  | T | 0.071 | 0.63 | 6.52E-09 | 0.53 |
| rs56850194  | 16 | 90043531 | <i>AFG3LIP</i>    | C  | A | 0.090 | 1.00 | 5.92E-11 | 0.09 |
| rs57856222  | 16 | 89682190 | <i>DPEP1</i>      | C  | T | 0.100 | 1.00 | 2.36E-10 | 0.15 |
| rs58656226  | 16 | 89745091 | <i>CDK10</i>      | T  | G | 0.108 | 0.99 | 2.94E-08 | 0.17 |
| rs58827852  | 16 | 90058754 | <i>AFG3LIP</i>    | G  | A | 0.110 | 0.99 | 5.71E-09 | 0.07 |
| rs59038611  | 16 | 90065956 | <i>AFG3LIP</i>    | G  | C | 0.095 | 1.00 | 1.16E-11 | 0.05 |
| rs59574756  | 16 | 90067513 | <i>AFG3LIP</i>    | A  | G | 0.095 | 1.00 | 1.85E-11 | 0.05 |
| rs61408277  | 16 | 89685234 | <i>DPEP1</i>      | G  | T | 0.099 | 1.00 | 1.55E-10 | 0.17 |
| rs62052243  | 16 | 90026152 | <i>DEF8</i>       | A  | G | 0.349 | 0.99 | 9.42E-09 | 0.28 |
| rs62054570  | 16 | 90063890 | <i>AFG3LIP</i>    | T  | G | 0.160 | 0.99 | 2.03E-12 | 0.05 |
| rs71396949  | 16 | 89714844 | <i>CHMP1A</i>     | G  | A | 0.095 | 0.98 | 3.50E-09 | 0.19 |
| rs71396950  | 16 | 89726550 | <i>SPATA33</i>    | G  | A | 0.096 | 0.99 | 3.09E-09 | 0.28 |
| rs71396951  | 16 | 89726593 | <i>SPATA33</i>    | G  | C | 0.096 | 0.99 | 3.08E-09 | 0.28 |

|            |    |          |                |   |   |       |      |          |      |
|------------|----|----------|----------------|---|---|-------|------|----------|------|
| rs7191697  | 16 | 89678165 | <i>DPEPI</i>   | G | A | 0.100 | 0.99 | 1.09E-11 | 0.19 |
| rs73283845 | 16 | 90055664 | <i>AFG3LIP</i> | C | T | 0.106 | 0.99 | 5.01E-09 | 0.05 |
| rs73283859 | 16 | 90062520 | <i>AFG3LIP</i> | G | C | 0.092 | 1.00 | 1.45E-11 | 0.06 |
| rs73283867 | 16 | 90066260 | <i>AFG3LIP</i> | T | G | 0.096 | 1.00 | 9.54E-12 | 0.05 |
| rs73283869 | 16 | 90067184 | <i>AFG3LIP</i> | G | A | 0.092 | 1.00 | 1.21E-11 | 0.05 |
| rs73283871 | 16 | 90067202 | <i>AFG3LIP</i> | T | C | 0.096 | 1.00 | 1.09E-11 | 0.05 |
| rs74336735 | 16 | 90065033 | <i>AFG3LIP</i> | T | A | 0.096 | 1.00 | 1.49E-11 | 0.06 |
| rs74583214 | 16 | 90110798 | <i>GAS8</i>    | C | T | 0.098 | 0.96 | 5.57E-09 | 0.04 |
| rs74800773 | 16 | 90024970 | <i>DEF8</i>    | C | G | 0.105 | 1.00 | 7.99E-12 | 0.22 |
| rs74836424 | 16 | 89507330 | <i>ANKRD</i>   | C | T | 0.079 | 1.00 | 7.69E-10 | 0.18 |
| rs75319471 | 16 | 90064454 | <i>AFG3LIP</i> | A | G | 0.095 | 1.00 | 1.47E-11 | 0.06 |
| rs75570604 | 16 | 89846677 | <i>FANCA</i>   | G | C | 0.096 | 1.00 | 1.01E-10 | 0.23 |
| rs75923656 | 16 | 89690990 | <i>DPEPI</i>   | T | C | 0.096 | 0.97 | 9.10E-11 | 0.17 |
| rs76265950 | 16 | 90085139 | <i>DBNDD1</i>  | A | C | 0.100 | 0.99 | 3.19E-09 | 0.06 |
| rs76581091 | 16 | 90065100 | <i>AFG3LIP</i> | T | C | 0.096 | 1.00 | 1.58E-11 | 0.06 |
| rs77110324 | 16 | 89683288 | <i>DPEPI</i>   | G | A | 0.089 | 1.00 | 4.58E-10 | 0.19 |
| rs77270200 | 16 | 90093075 | <i>GAS8</i>    | G | A | 0.099 | 1.00 | 2.07E-09 | 0.05 |
| rs77381714 | 16 | 90078022 | <i>DBNDD1</i>  | T | C | 0.091 | 0.99 | 4.39E-11 | 0.05 |
| rs77603042 | 16 | 90083239 | <i>DBNDD1</i>  | A | G | 0.100 | 0.99 | 3.45E-09 | 0.06 |
| rs77606435 | 16 | 90053691 | <i>AFG3LIP</i> | C | G | 0.094 | 1.00 | 1.59E-11 | 0.06 |
| rs77733403 | 16 | 90080723 | <i>DBNDD1</i>  | T | C | 0.179 | 0.98 | 2.48E-08 | 0.32 |
| rs77770855 | 16 | 90043010 | <i>AFG3LIP</i> | G | A | 0.088 | 0.98 | 1.05E-10 | 0.11 |
| rs78536691 | 16 | 90100471 | <i>GAS8</i>    | T | C | 0.097 | 0.98 | 1.92E-09 | 0.07 |
| rs78800020 | 16 | 90067136 | <i>AFG3LIP</i> | G | C | 0.096 | 1.00 | 1.12E-11 | 0.05 |
| rs79138604 | 16 | 89690991 | <i>DPEPI</i>   | G | A | 0.096 | 0.97 | 9.11E-11 | 0.17 |
| rs79139787 | 16 | 89795360 | <i>ZNF276</i>  | C | T | 0.086 | 0.92 | 8.87E-11 | 0.15 |
| rs79172130 | 16 | 89687812 | <i>DPEPI</i>   | G | A | 0.099 | 1.00 | 1.53E-10 | 0.17 |
| rs79418450 | 16 | 90100505 | <i>GAS8</i>    | G | C | 0.097 | 0.98 | 1.73E-09 | 0.06 |

|           |    |          |                |   |   |       |      |          |      |
|-----------|----|----------|----------------|---|---|-------|------|----------|------|
| rs8049897 | 16 | 90024202 | <i>DEF8</i>    | G | A | 0.170 | 1.00 | 5.48E-13 | 0.15 |
| rs8051733 | 16 | 90024206 | <i>DEF8</i>    | A | G | 0.343 | 0.99 | 2.12E-09 | 0.27 |
| rs8063160 | 16 | 90054709 | <i>AFG3LIP</i> | T | C | 0.106 | 0.99 | 3.17E-09 | 0.04 |
| rs9926296 | 16 | 89818089 | <i>FANCA</i>   | A | A | 0.488 | 1.00 | 3.54E-08 | 0.69 |

Abbreviations: Chr, chromosome; Ref allele, reference allele; MAF, minor allele frequency; Info score, imputation quality score; p-1DF, p-value for the conventional 1 degree-of-freedom test; p-2DF, p-value for the 2 degree-of-freedom joint test

### **Analysis of SNPs identified by Landi et al.**

A recent analysis by Landi et al.<sup>1</sup> identified 86 melanoma susceptibility loci based on 36,760 melanoma cases and 375,188 controls from across the United Kingdom, United States, Northern and Western Europe, and the Mediterranean. Most of these participants (67% of cases and 96% of controls) had not been included in a previous melanoma genome-wide association study. We tested these variants for significance in our dataset (Table S2). In total, eight SNPs identified by Landi et al. were statistically significant in our analysis according to the 2-df test after adjusting for multiple comparisons ( $p < 0.05/86 = 0.00058$ ). These SNPs included rs76798800 on chromosome 1, rs149617956 on chromosome 3, rs13178866 and rs16891982 on chromosome 5, rs871024 on chromosome 9, rs1126809 on chromosome 11, rs1805007 on chromosome 16, and rs6059655 on chromosome 20. The SNPs on chromosomes 9 and 16 are in high linkage disequilibrium with the index SNPs ( $r^2 = 0.98$  and  $0.68$ , respectively). Of these SNPs, only rs13178866 on chromosome 5 (mapped to *TERT*) showed any evidence of interaction according to the 1-df test ( $p = 0.05$ ). Although the 2-df p-value was too large to be identified in the main analysis ( $p = 1.21E-06$ ), an interaction with this SNP is biologically plausible. *TERT* has been implicated in melanogenesis<sup>2,3</sup> and evidence suggests that this may be due to mechanisms related to UV radiation exposure.<sup>4</sup> If *TERT* does impact melanoma risk via UV exposure, then an interaction with citrus consumption, by which ingested furocoumarins increase skin sensitivity to UV radiation, is certainly plausible.<sup>5</sup> Further research is needed to confirm this finding, particularly since the 2-df p-value did not reach  $5E-08$  in our population.



**Table S2. SNPs identified by Landi et al. and their results in the current analysis**

| SNP ID                         | Chr / Pos            | Mapped Gene(s)                          | MAF           | Info score  | p-2DF            | p-1DF        |
|--------------------------------|----------------------|-----------------------------------------|---------------|-------------|------------------|--------------|
| rs670318                       | 1 / 63727542         | <i>FOXD3</i>                            | 0.047         | 1.00        | 0.034            | 0.92         |
| rs8444                         | 1 / 150938571        | <i>RP11-3l6M1.12, CERS2, CTSS, ARNT</i> | 0.36          | 1.00        | 0.18             | 0.079        |
| <b>rs76798800</b>              | <b>1 / 154994978</b> | <b><i>ZBTB7A, ADAM15, GBA</i></b>       | <b>0.26</b>   | <b>1.00</b> | <b>0.00027*</b>  | <b>0.46</b>  |
| rs2695237                      | 1 / 226603635        | <i>PARP1</i>                            | 0.34          | 0.99        | 0.0035           | 0.65         |
| rs195720                       | 1 / 24787947         | <i>NIPAL3</i>                           | 0.39          | 0.98        | 0.21             | 0.98         |
| rs34517439                     | 1 / 78450517         | <i>DNAJB4</i>                           | 0.12          | 0.97        | 0.018            | 0.80         |
| rs7533482                      | 1 / 214673271        | <i>PTPN14</i>                           | 0.19          | 0.97        | 0.016            | 0.45         |
| rs2369633                      | 1 / 205181062        | <i>DSTYK</i>                            | 0.089         | 1.00        | 0.014            | 0.92         |
| rs1800440                      | 2 / 38298139         | <i>CYP1B1</i>                           | 0.18          | 1           | 0.24             | 0.23         |
| rs10931936                     | 2 / 202143928        | <i>CASP8</i>                            | 0.27          | 1           | 0.61             | 0.44         |
| rs6745983                      | 2 / 135430709        | <i>TMEM163</i>                          | 0.41          | 0.99        | 0.024            | 0.21         |
| rs16849932                     | 2 / 214065880        | <i>IKZF2</i>                            | 0.079         | 0.99        | 0.27             | 0.19         |
| rs11677464                     | 2 / 240065356        | <i>HDAC4</i>                            | 0.10          | 0.99        | 0.45             | 0.85         |
| rs12473635                     | 2 / 25778637         | <i>DTNB</i>                             | 0.22          | 1.00        | 0.90             | 0.83         |
| <b>rs149617956<sup>a</sup></b> | <b>3 / 70014091</b>  | <b><i>MITF</i></b>                      | <b>0.0035</b> | <b>0.92</b> | <b>2.10E-08*</b> | <b>0.71</b>  |
| rs3950296                      | 3 / 169493283        | <i>TERC</i>                             | 0.24          | 1.00        | 0.13             | 0.36         |
| rs11730662                     | 4 / 37470753         | <i>KIAA1239</i>                         | 0.32          | 1.00        | 0.91             | 0.95         |
| rs7714232                      | 5 / 56011357         | <i>MAP3K1</i>                           | 0.17          | 1.00        | 0.25             | 0.80         |
| rs12523094                     | 5 / 90262612         | <i>GPR98</i>                            | 0.40          | 0.99        | 0.14             | 0.64         |
| <b>rs13178866</b>              | <b>5 / 1323212</b>   | <b><i>TERT</i></b>                      | <b>0.43</b>   | <b>1.00</b> | <b>1.21E-06*</b> | <b>0.050</b> |
| <b>rs16891982</b>              | <b>5 / 33951693</b>  | <b><i>SLC45A2</i></b>                   | <b>0.069</b>  | <b>1.00</b> | <b>8.94E-05*</b> | <b>0.43</b>  |
| rs32578                        | 5 / 149211868        | <i>PPARGC1B</i>                         | 0.32          | 1.00        | 0.098            | 0.078        |
| rs12215602                     | 6 / 1145265          | <i>IRF4</i>                             | 0.29          | 1.00        | 0.059            | 0.55         |
| rs72834823                     | 6 / 22719379         | <i>HDGFL1</i>                           | 0.17          | 0.99        | 0.012            | 0.34         |
| rs28986343                     | 6 / 32748953         | <i>HLA-DQB2</i>                         | 0.041         | 0.78        | 0.26             | 0.53         |
| rs6908626                      | 6 / 91005743         | <i>BACH2</i>                            | 0.17          | 0.99        | 0.63             | 0.54         |
| rs6914598                      | 6 / 21163919         | <i>CDKAL1</i>                           | 0.33          | 0.98        | 0.048            | 0.44         |
| rs75818295                     | 6 / 7189567          | <i>RREB1</i>                            | 0.049         | 0.95        | 0.34             | 0.49         |
| rs548304                       | 6 / 11637483         | <i>ADTRP</i>                            | 0.19          | 0.97        | 0.40             | 0.51         |
| rs10949304                     | 6 / 15503696         | <i>DTNBP1</i>                           | 0.43          | 0.98        | 0.69             | 0.94         |
| rs2857482                      | 6 / 50790642         | <i>TFAP2B</i>                           | 0.11          | 0.99        | 0.22             | 0.97         |
| rs10434895                     | 6 / 151577739        | <i>AKAP12</i>                           | 0.45          | 1.00        | 0.14             | 0.55         |
| rs10434896                     | 6 / 151577739        | <i>AKAP12</i>                           | 0.45          | 1.00        | 0.13             | 0.52         |
| rs117132860                    | 7 / 17134708         | <i>AGR3</i>                             | 0.025         | 1.00        | 0.26             | 0.63         |
| rs12539524                     | 7 / 22115454         | <i>RAPGEF5</i>                          | 0.14          | 0.99        | 0.35             | 0.30         |

|                             |                      |                                          |             |             |                  |              |
|-----------------------------|----------------------|------------------------------------------|-------------|-------------|------------------|--------------|
| rs4731207                   | 7 / 124396645        | <i>POT1</i>                              | 0.45        | 1.00        | 0.023            | 0.20         |
| rs7778378                   | 7 / 130738666        | <i>MKLN1</i>                             | 0.22        | 1.00        | 0.11             | 0.85         |
| rs6994183                   | 8 / 21951009         | <i>FAM160B2</i>                          | 0.12        | 0.99        | 0.35             | 0.35         |
| rs13263376                  | 8 / 72864240         | <i>RP11-383H13.1, MSC</i>                | 0.36        | 0.99        | 0.10             | 0.32         |
| rs111595456                 | 8 / 13138979         | <i>ASAP1</i>                             | 0.035       | 0.98        | 0.095            | 0.21         |
| rs520015                    | 9 / 211762           | <i>CBWD1</i>                             | 0.49        | 1.00        | 0.017            | 0.47         |
| rs593179                    | 9 / 235201           | <i>CBWD1</i>                             | 0.44        | 0.99        | 0.089            | 0.67         |
| rs10960710                  | 9 / 12587153         | <i>TYRP1</i>                             | 0.37        | 0.99        | 0.37             | 0.71         |
| rs1339759                   | 9 / 110711586        | <i>KLF4</i>                              | 0.37        | 0.99        | 0.0022           | 0.090        |
| rs3780269                   | 9 / 134457580        | <i>RAPGEF1</i>                           | 0.32        | 0.99        | 0.0050           | <b>0.035</b> |
| <b>rs871024<sup>b</sup></b> | <b>9 / 21803880</b>  | <b><i>MTAP, CDK2NA</i></b>               | <b>0.48</b> | <b>1.00</b> | <b>2.10E-10*</b> | <b>0.23</b>  |
| rs10739220                  | 9 / 109054417        | <i>TMEM38B</i>                           | 0.23        | 1.00        | 0.37             | 0.35         |
| rs7902587                   | 10 / 105694301       | <i>OBFC1</i>                             | 0.098       | 0.98        | 0.011            | 0.087        |
| rs76154345                  | 10 / 5767177         | <i>GDI2</i>                              | 0.22        | 1.00        | 0.71             | 0.74         |
| rs11194997                  | 10 / 111889779       | <i>MXI1</i>                              | 0.19        | 1.00        | 0.11             | 0.62         |
| rs11041426                  | 11 / 7543519         | <i>PPFIBP2</i>                           | 0.38        | 0.99        | 0.40             | 0.96         |
| rs10897275                  | 11 / 62203865        | <i>AHNAK</i>                             | 0.32        | 0.99        | 0.019            | 0.78         |
| rs12225068                  | 11 / 91616691        | <i>FAT3</i>                              | 0.071       | 0.92        | 0.13             | 0.79         |
| rs7941496                   | 11 / 16041305        | <i>SOX6</i>                              | 0.48        | 0.98        | 0.42             | 0.51         |
| rs4354713                   | 11 / 69380898        | <i>CCND1</i>                             | 0.34        | 0.99        | 0.0075           | 0.36         |
| <b>rs1126809</b>            | <b>11 / 89017961</b> | <b><i>TYR</i></b>                        | <b>0.29</b> | <b>1.00</b> | <b>0.00036*</b>  | <b>0.30</b>  |
| rs1801516                   | 11 / 108175462       | <i>ATM</i>                               | 0.14        | 1.00        | 0.00079          | 0.77         |
| rs12290699                  | 11 / 120195702       | <i>TMEM136</i>                           | 0.24        | 1.00        | 0.13             | 0.16         |
| rs1056927                   | 12 / 13070752        | <i>MIR614, GPRC5A, APOLD1, RPL13AP20</i> | 0.42        | 1.00        | 0.72             | 0.84         |
| rs4237963                   | 12 / 17275460        | <i>LMO3</i>                              | 0.19        | 1.00        | 0.21             | 0.091        |
| rs10859996                  | 12 / 96378807        | <i>HAL, RP11-256L6.3</i>                 | 0.36        | 1.00        | 0.00080          | 0.81         |
| rs113469387                 | 12 / 116580291       | <i>MED13L</i>                            | 0.11        | 1.00        | 0.20             | 0.66         |
| rs1278768                   | 13 / 113535949       | <i>MCF2L</i>                             | 0.47        | 1.00        | 0.35             | 0.60         |
| rs474240                    | 13 / 76351286        | <i>LMO7</i>                              | 0.35        | 1.00        | 0.38             | 0.43         |
| rs75414584                  | 13 / 114744546       | <i>RASA3</i>                             | 0.10        | 0.88        | 0.23             | 0.18         |
| rs10873172                  | 14 / 64390030        | <i>SYNE2</i>                             | 0.28        | 0.99        | 0.69             | 0.97         |
| rs11625064                  | 14 / 69226931        | <i>ZFP36L1</i>                           | 0.37        | 0.99        | 0.43             | 0.29         |
| rs4904871                   | 14 / 92795912        | <i>SLC24A4</i>                           | 0.45        | 0.98        | 0.16             | 0.40         |
| rs2273699                   | 14 / 103923475       | <i>MARK3</i>                             | 0.34        | 1.00        | 0.62             | 0.77         |
| rs117648907                 | 15 / 33277710        | <i>FNMI</i>                              | 0.024       | 1.00        | 0.49             | 0.26         |
| rs2675345                   | 15 / 48400199        | <i>SLC24A5</i>                           | 0.027       | 0.96        | 0.35             | 0.15         |
| rs12913832                  | 15 / 28365618        | <i>OCA2</i>                              | 0.26        | 1.00        | 0.44             | 0.56         |
| rs62034121                  | 16 / 54118132        | <i>FTO</i>                               | 0.16        | 0.99        | 0.030            | <b>0.035</b> |

|                              |                      |                            |              |             |                  |              |
|------------------------------|----------------------|----------------------------|--------------|-------------|------------------|--------------|
| rs62034139                   | 16 / 54131939        | <i>FTO</i>                 | 0.17         | 1.00        | 0.11             | 0.16         |
| rs12930459                   | 16 / 55322732        | <i>IRX6</i>                | 0.19         | 1.00        | 0.82             | 0.60         |
| <b>rs1805007<sup>c</sup></b> | <b>16 / 89986117</b> | <b><i>MC1R</i></b>         | <b>0.098</b> | <b>1</b>    | <b>5.31E-13*</b> | <b>0.30</b>  |
| rs4420522                    | 16 / 68822971        | <i>CDH1, ZFP90, FTLP14</i> | 0.30         | 1.00        | 0.014            | 0.17         |
| rs2967383                    | 16 / 82217153        | <i>MPHOSPH6</i>            | 0.28         | 1.00        | 0.26             | 0.44         |
| rs78378222                   | 17 / 7571752         | <i>TP53</i>                | 0.012        | 0.95        | 0.0018           | 0.74         |
| rs12984831                   | 19 / 3540539         | <i>MFS12</i>               | 0.0086       | 0.91        | 0.013            | <b>0.043</b> |
| rs143190905                  | 20 / 62291767        | <i>RETL1</i>               | 0.080        | 0.99        | 0.74             | 0.79         |
| <b>rs6059655</b>             | <b>20 / 32665748</b> | <b><i>ASIP</i></b>         | <b>0.099</b> | <b>0.96</b> | <b>0.00022*</b>  | <b>0.061</b> |
| rs408825                     | 21 / 42743496        | <i>MX2</i>                 | 0.40         | 1.00        | 0.10             | 0.83         |
| rs5766565                    | 22 / 45622684        | <i>KIAA0930</i>            | 0.34         | 0.99        | 0.39             | 0.19         |
| rs79966207                   | 22 / 50722408        | <i>PLXNB2</i>              | 0.17         | 1.00        | 0.030            | 0.38         |
| rs132941                     | 22 / 38545942        | <i>MAFF</i>                | 0.45         | 1.00        | 0.010            | 0.47         |

Abbreviations: Chr, chromosome; Pos, position; MAF, minor allele frequency; p-1DF, p-value for the conventional 1 degree-of-freedom test; p-2DF, p-value for the 2 degree-of-freedom joint test; LD, linkage disequilibrium.

\*Significant SNPs identified by 2-df test after adjusting for multiple comparisons ( $p < 0.05/86 = 0.00058$ ) are highlighted in bold.

<sup>a</sup> LD  $r^2$  with index SNP rs183783391 on chromosome 3 is 0.2.

<sup>b</sup> LD  $r^2$  with index SNP rs8693299 on chromosome 9 is 0.98.

<sup>c</sup> LD  $r^2$  with index SNP rs11446223 on chromosome 16 is 0.68.

## References

1. Landi MT, Bishop DT, MacGregor S, Machiela MJ, Stratigos AJ, Ghorzo P, Brossard M, Calista D, Choi J, Fargnoli MC. Genome-wide association meta-analyses combining multiple risk phenotypes provide insights into the genetic architecture of cutaneous melanoma susceptibility. *Nat Genet* 2020;52: 494-504
2. Horn S, Figl A, Rachakonda PS, Fischer C, Sucker A, Gast A, Kadel S, Moll I, Nagore E, Hemminki K. TERT promoter mutations in familial and sporadic melanoma. *Science* 2013;339: 959-61
3. Huang FW, Hodis E, Xu MJ, Kryukov GV, Chin L, Garraway LA. Highly recurrent TERT promoter mutations in human melanoma. *Science* 2013;339: 957-9
4. Nagore E, Reyes-Garcia D, Heidenreich B, Garcia-Casado Z, Requena C, Kumar R. TERT promoter mutations associate with MC1R variants in melanoma patients. *Pigment cell & melanoma research* 2017;30: 273-5
5. Melough MM, Chun OK. Dietary furocoumarins and skin cancer: A review of current biological evidence. *Food Chem Toxicol* 2018;122: 163-71
